# Supplementary material for: Carp Edema Virus and Cyprinid Herpesvirus-3 Coinfection is Associated with Mass Mortality of Koi (Cyprinus carpio haematopterus) in the Republic of Korea
Source: PubMed Central journal article supplement (PMC7157718; doi:10.3390/pathogens9030222), 2020-03-17
Supplement: pathogens-09-00222-s001.pdf [file pathogens-09-00222-s001.pdf]

## Supplementary Materials

**Table S1.** Ct values of qPCR for CEV and CyHV-3 detection.

| Organ                         | Koi ID  | Ct Value |       |
|-------------------------------|---------|----------|-------|
|                               |         | CyHV-3   | CEV   |
| Kidney                        | Koi-A   | 18.86    | 36.66 |
|                               | Koi-B   | 33.62    | 27.95 |
|                               | Average | 26.24    | 32.31 |
| Hepatopancreas                | Koi-A   | 33.66    | 28.92 |
|                               | Koi-B   | 35.76    | 39.93 |
|                               | Average | 34.71    | 34.42 |
| Spleen                        | Koi-A   | 31.21    | 34.50 |
|                               | Koi-B   | 36.46    | 37.25 |
|                               | Average | 33.84    | 35.87 |
| Gill                          | Koi-A   | 21.97    | 19.85 |
|                               | Koi-B   | 27.75    | 20.92 |
|                               | Average | 24.86    | 20.38 |
| Intestine                     | Koi-A   | 29.19    | 29.85 |
|                               | Koi-B   | 31.91    | 33.05 |
|                               | Average | 30.55    | 31.45 |
| Master Mix negative control   | Koi-A   | >40      | >40   |
|                               | Koi-B   | >40      | >40   |
|                               | Average | >40      | >40   |
| Template DNA negative control | Koi-A   | >40      | >40   |
|                               | Koi-B   | >40      | >40   |
|                               | Average | >40      | >40   |

Ct values are calibrated with Ct values of koi glucokinase to match the number of host cells used for each assay [27]. Average value is the average of koi-A and koi-B of each assay.
